# Supplementary material for: Effect of Daily Ingestion of Quercetin-Rich Onion Powder for 12 Weeks on Visceral Fat: A Randomised, Double-Blind, Placebo-Controlled, Parallel-Group Study
Source: PubMed Central journal article supplement (PMC7019606; doi:10.3390/nu12010091), 2019-12-28
Supplement: nutrients-12-00091-s001.pdf [file nutrients-12-00091-s001.pdf]

## Supplementary Materials

**Table S1.** Dietary nutrients for the placebo and quercetin-rich onion groups

|                                |                      | <i>n</i> | Week 0         | Δweek 4       | Δweek 8       | Δweek 12      |
|--------------------------------|----------------------|----------|----------------|---------------|---------------|---------------|
| Calorie (kcal)                 | Placebo              | 27       | 1737.7 ± 397.3 | 50.8 ± 189.3  | 80.5 ± 374.6  | 30.8 ± 300.0  |
|                                | Quercetin-rich onion | 27       | 1879.9 ± 372.3 | -56.9 ± 250.2 | -84.9 ± 295.8 | -66.9 ± 371.2 |
|                                | <i>p</i>             |          | 0.18           | 0.08          | 0.08          | 0.29          |
| Protein (g)                    | Placebo              | 27       | 63.0 ± 16.1    | 5.2 ± 11.8    | 4.1 ± 14.5    | 3.6 ± 14.3    |
|                                | Quercetin-rich onion | 27       | 69.3 ± 16.5    | -2.8 ± 9.5    | -3.3 ± 11.5   | 0.4 ± 15.5    |
|                                | <i>p</i>             |          | 0.16           | 0.008*        | 0.041*        | 0.44          |
| Lipid (g)                      | Placebo              | 27       | 62.5 ± 20.1    | 2.7 ± 9.4     | 4.7 ± 18.2    | 1.7 ± 15.1    |
|                                | Quercetin-rich onion | 27       | 68.1 ± 17.1    | -1.3 ± 11.8   | -4.3 ± 13.6   | -1.6 ± 14.6   |
|                                | <i>p</i>             |          | 0.27           | 0.17          | 0.044*        | 0.42          |
| Carbohydrate (g)               | Placebo              | 27       | 223.7 ± 43.3   | 1.2 ± 25.1    | 5.6 ± 47.3    | 0.0 ± 32.4    |
|                                | Quercetin-rich onion | 27       | 234.6 ± 46.9   | -8.3 ± 34.2   | -7.7 ± 39.4   | -13.0 ± 59.6  |
|                                | <i>p</i>             |          | 0.38           | 0.25          | 0.27          | 0.32          |
| Dietary fibre (g)              | Placebo              | 27       | 13.0 ± 3.8     | -0.3 ± 2.5    | 0.4 ± 2.4     | -0.8 ± 2.9    |
|                                | Quercetin-rich onion | 27       | 13.5 ± 3.1     | -1.5 ± 2.5    | -1.5 ± 2.9    | -1.3 ± 3.5    |
|                                | <i>p</i>             |          | 0.64           | 0.08          | 0.011*        | 0.57          |
| Sodium chloride equivalent (g) | Placebo              | 27       | 9.0 ± 2.8      | 0.3 ± 2.0     | 0.6 ± 2.7     | 0.2 ± 2.1     |
|                                | Quercetin-rich onion | 27       | 8.3 ± 2.2      | 0.2 ± 2.3     | 0.0 ± 2.3     | 0.1 ± 2.4     |
|                                | <i>p</i>             |          | 0.29           | 0.88          | 0.40          | 0.93          |

Values are shown in terms of the mean and standard deviation. Δweek 4, change in value from baseline to week 4; Δweek 8, change in value from baseline to week 8; Δweek 12, change in value from baseline to week 12. Student's *t*-test was performed.

**Table S2.** Complete blood counts, renal function, lipid profile and blood glucose profile

| Variable                   |                      | <i>n</i> | Week 0       | Δweek 4    | Δweek 8    | Δweek 12    |
|----------------------------|----------------------|----------|--------------|------------|------------|-------------|
| WBC (×10 <sup>3</sup> /μl) | Placebo              | 33       | 5.6 ± 1.4    | 0.3 ± 0.9  | 0.1 ± 0.8  | -0.1 ± 0.9  |
|                            | Quercetin-rich onion | 34       | 5.7 ± 1.4    | -0.1 ± 0.7 | 0.0 ± 0.9  | -0.1 ± 1.3  |
|                            | <i>p</i>             |          | 0.92         | 0.12       | 0.98       | 0.97        |
| RBC (×10 <sup>4</sup> /μl) | Placebo              | 33       | 459.5 ± 36.1 | 1.1 ± 14.2 | 2.3 ± 19.0 | -3.0 ± 20.0 |
|                            | Quercetin-rich onion | 34       | 462.6 ± 43.9 | 0.9 ± 18.5 | 3.2 ± 19.6 | 0.2 ± 25.8  |
|                            | <i>p</i>             |          | 0.76         | 0.96       | 0.96       | 0.60        |
| Hb (g/dL)                  | Placebo              | 33       | 14.0 ± 1.0   | -0.1 ± 0.5 | -0.1 ± 0.6 | -0.4 ± 0.6  |
|                            | Quercetin-rich onion | 34       | 13.8 ± 1.5   | 0.0 ± 0.5  | 0.0 ± 0.5  | 0.0 ± 0.7   |
|                            | <i>p</i>             |          | 0.67         | 0.46       | 0.65       | 0.040*      |
| Ht (%)                     | Placebo              | 33       | 42.3 ± 2.7   | 0.1 ± 1.4  | 1.5 ± 1.7  | -0.5 ± 1.7  |
|                            | Quercetin-rich onion | 34       | 41.6 ± 3.9   | 0.3 ± 1.6  | 1.4 ± 1.8  | 0.1 ± 2.0   |
|                            | <i>p</i>             |          | 0.45         | 0.52       | 0.84       | 0.18        |
| Plt (×10 <sup>4</sup> /μl) | Placebo              | 33       | 27.6 ± 5.2   | 0.0 ± 2.6  | 0.2 ± 2.9  | 0.6 ± 2.9   |
|                            | Quercetin-rich onion | 34       | 27.1 ± 6.5   | 0.9 ± 2.4  | 1.3 ± 2.4  | 1.1 ± 2.5   |
|                            | <i>p</i>             |          | 0.74         | 0.20       | 0.12       | 0.51        |

|               |                      |    |              |             |              |              |
|---------------|----------------------|----|--------------|-------------|--------------|--------------|
|               | Placebo              | 33 | 12.7 ± 2.7   | 0.5 ± 2.3   | 1.2 ± 2.7    | 1.1 ± 2.0    |
| BUN (mg/dl)   | Quercetin-rich onion | 34 | 13.4 ± 3.0   | 1.0 ± 3.8   | 0.4 ± 2.4    | 0.8 ± 2.7    |
|               | <i>p</i>             |    | 0.32         | 0.53        | 0.28         | 0.58         |
|               | Placebo              | 33 | 0.8 ± 0.1    | 0.0 ± 0.0   | 0.0 ± 0.0    | 0.0 ± 0.1    |
| CRE (mg/dl)   | Quercetin-rich onion | 34 | 0.8 ± 0.1    | 0.0 ± 0.0   | 0.0 ± 0.1    | 0.0 ± 0.1    |
|               | <i>p</i>             |    | 0.25         | 0.22        | 0.23         | 0.32         |
|               | Placebo              | 33 | 4.7 ± 1.0    | -0.1 ± 0.3  | -0.1 ± 0.4   | 0.1 ± 0.5    |
| UA (mg/dl)    | Quercetin-rich onion | 34 | 5.2 ± 1.2    | 0.2 ± 0.6   | 0.1 ± 0.6    | 0.0 ± 0.6    |
|               | <i>p</i>             |    | 0.13         | 0.033*      | 0.06         | 0.63         |
|               | Placebo              | 33 | 221.3 ± 33.6 | 5.2 ± 24.0  | 5.8 ± 15.9   | 12.0 ± 24.7  |
| TC (mg/dl)    | Quercetin-rich onion | 34 | 222.0 ± 31.4 | 9.5 ± 17.4  | 6.7 ± 17.7   | 1.0 ± 15.9   |
|               | <i>p</i>             |    | 0.93         | 0.45        | 0.83         | 0.049*       |
|               | Placebo              | 33 | 133.8 ± 27.2 | 5.1 ± 16.8  | 1.8 ± 13.7   | 8.1 ± 22.4   |
| LDL-C (mg/dl) | Quercetin-rich onion | 34 | 135.9 ± 29.8 | 8.5 ± 16.5  | 3.9 ± 16.7   | -0.7 ± 12.3  |
|               | <i>p</i>             |    | 0.78         | 0.45        | 0.60         | 0.07         |
|               | Placebo              | 33 | 70.4 ± 14.0  | 0.2 ± 6.6   | 1.0 ± 6.2    | 4.0 ± 8.4    |
| HDL-C (mg/dl) | Quercetin-rich onion | 34 | 68.2 ± 15.0  | 1.6 ± 5.4   | -0.7 ± 5.2   | 1.4 ± 6.1    |
|               | <i>p</i>             |    | 0.54         | 0.40        | 0.26         | 0.19         |
|               | Placebo              | 33 | 97.2 ± 44.3  | -3.7 ± 33.9 | -12.9 ± 32.2 | -11.0 ± 19.4 |
| TG (mg/dl)    | Quercetin-rich onion | 34 | 103.1 ± 47.1 | 5.4 ± 31.7  | -0.4 ± 56.7  | -11.3 ± 40.9 |
|               | <i>p</i>             |    | 0.61         | 0.30        | 0.31         | 0.97         |
|               | Placebo              | 33 | 88.7 ± 8.2   | 2.1 ± 4.1   | 0.5 ± 5.5    | 2.9 ± 4.1    |
| FPG (mg/dl)   | Quercetin-rich onion | 34 | 91.0 ± 6.9   | 0.8 ± 3.6   | -0.6 ± 5.2   | 2.6 ± 6.6    |
|               | <i>p</i>             |    | 0.23         | 0.23        | 0.44         | 0.81         |
|               | Placebo              | 33 | 5.4 ± 0.3    | 0.0 ± 0.1   | 0.0 ± 0.1    | 0.0 ± 0.1    |
| HbA1c (%)     | Quercetin-rich onion | 34 | 5.4 ± 0.3    | 0.0 ± 0.1   | 0.0 ± 0.1    | 0.0 ± 0.2    |
|               | <i>p</i>             |    | 1.00         | 0.78        | 0.52         | 0.80         |
|               | Placebo              | 33 | 1.3 ± 0.6    | 0.1 ± 0.4   | 0.0 ± 0.5    | 0.1 ± 0.5    |
| HOMA-IR       | Quercetin-rich onion | 34 | 1.3 ± 0.8    | -0.1 ± 0.7  | -0.2 ± 0.9   | 0.0 ± 0.9    |
|               | <i>p</i>             |    | 0.64         | 0.24        | 0.36         | 0.72         |

Values are shown in terms of the mean and standard deviation. Δweek 4, change in value from baseline to week 4; Δweek 8, change in value from baseline to week 8; Δweek 12, change in value from baseline to week 12. Student's t-test was performed.  $p^* < 0.05$ . WBC, white blood cell; RBC, red blood cell; Hb, hemoglobin; Ht, hematocrit; Plt, platelet; BUN, blood urea nitrogen; CRE, creatinine; UA, uric acid; TC, total cholesterol; LDL-C, low-density lipoprotein cholesterol; HDL-C, high-density lipoprotein cholesterol; TG, triglyceride; FPG, fasting plasma glucose; HbA1c, hemoglobin A1c; HOMA-IR, homeostasis model assessment of insulin resistance.

**Table S3.** Adverse events

| Symptoms                   | Placebo, <i>n</i> | Quercetin-rich onion, <i>n</i> |
|----------------------------|-------------------|--------------------------------|
| Variation in liver markers | 10                | 12                             |
| Variation in renal markers | 0                 | 2                              |
| Variation in lipid profile | 4                 | 12                             |
| Variation in CBCs          | 1                 | 1                              |
| Digestive symptoms         | 5                 | 1                              |
| Dizziness                  | 1                 | 0                              |
| Eczema                     | 1                 | 0                              |
| Menopausal symptoms        | 0                 | 1                              |
| Throat discomfort          | 0                 | 1                              |
| Dysuria                    | 0                 | 1                              |
| Leg injury                 | 0                 | 1                              |
| Swelling                   | 0                 | 1                              |

CBCs, Complete blood counts.
